# Supplementary material for: Interband-transition-modified third-order nonlinear optical properties of Al nanoshells in carbon disulfide
Source: Royal Society of Chemistry journal article supplement (doi:10.1039/c5ra25981a), 2016-01-01
Supplement: c5ra25981a1.pdf [file c5ra25981a1.pdf]

# Interband-transitions-modified third-order nonlinear optical properties of Al nanoshells in carbon disulphide

Guangyi Jia<sup>a</sup> and Chungang Guo<sup>b</sup>

<sup>a</sup>School of Science, Tianjin University of Commerce, Tianjin 300134, PR China.

<sup>b</sup>Key Laboratory of Beam Technology and Material Modification of the Ministry of Education, College of Nuclear Science and Technology, Beijing Normal University, Beijing 100875, PR China. E-mail: [hngcg@bnu.edu.cn](mailto:hngcg@bnu.edu.cn).

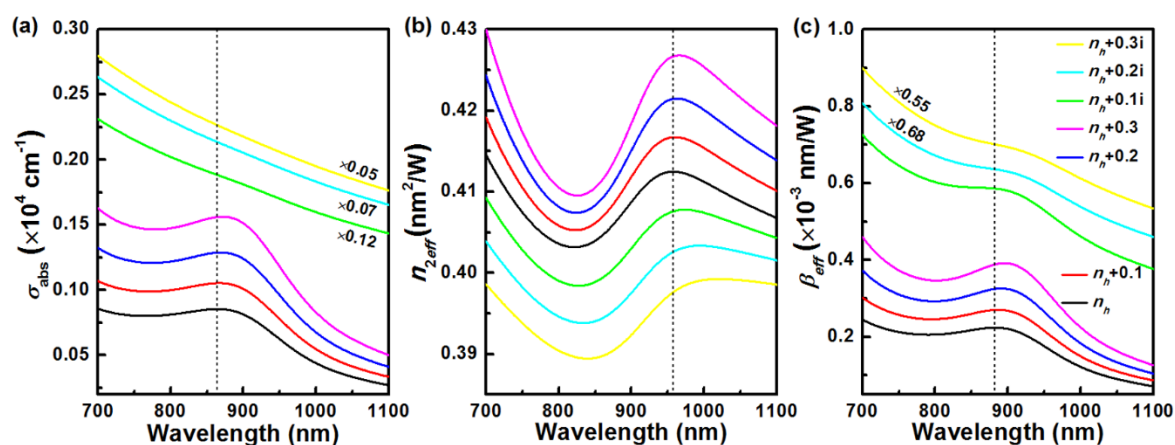

Fig. S1 (a) Linear absorption coefficient  $\sigma_{abs}$ , nonlinear (b) refractive index  $n_{2eff}$  and (c) absorption coefficient  $\beta_{eff}$  of an Al-CS<sub>2</sub> composite with and without artificial increases in the linear refractive index or absorption coefficient of the CS<sub>2</sub> host. The thickness of Al nanoshells is set as  $t = 4$  nm. Dashed vertical lines indicate the peak positions of  $\sigma_{abs}$ ,  $n_{2eff}$  and  $\beta_{eff}$  without changing the  $\eta_h$  value,

$$\text{i.e., } \eta_h = n_h.$$
